# Supplementary material for: Hypolipidemic activity of lactic acid bacteria: Adjunct therapy for potential probiotics
Source: PubMed Central journal article supplement (PMC9223303; doi:10.1371/journal.pone.0269953), 2022-06-23
Supplement: pone.0269953.s008.pdf [file pone.0269953.s008.pdf]

**Table 1: API 50 CH fermentation patterns of the six selected LAB isolates.**

| Test substance           | Isolate no. |    |   |     |    |     |
|--------------------------|-------------|----|---|-----|----|-----|
|                          | 17          | 33 | 1 | 34  | 35 | 16  |
| Control                  | -           | -  | - | -   | -  | -   |
| Glycerol                 | -           | -  | - | -   | -  | -   |
| Erythritol               | -           | -  | - | -   | -  | -   |
| D-Arabinose              | -           | -  | - | -   | -  | -   |
| L-Arabinose              | -           | -  | + | +   | -  | +   |
| D-Ribose                 | +           | -  | + | -   | +  | +/- |
| D-Xylose                 | -           | -  | - | -   | -  | -   |
| L-Xylose                 | -           | -  | - | -   | -  | -   |
| D-Adonitol               | -           | -  | - | -   | -  | -   |
| Methyl-D-xylopyranoside  | -           | -  | - | -   | -  | -   |
| D-Galactose              | +           | -  | + | +   | +  | +   |
| D-Glucose                | +           | +  | + | +   | +  | +   |
| D-Fructose               | +           | +  | + | +   | +  | +   |
| D-Mannose                | +           | -  | + | +   | +  | +   |
| L-Sorbose                | -           | -  | - | -   | -  | -   |
| L-Rhamnose               | -           | -  | - | -   | -  | -   |
| Dulcitol                 | -           | -  | - | -   | -  | -   |
| Inositol                 | -           | -  | - | -   | -  | -   |
| D-Mannitol               | -           | -  | + | +/- | -  | +   |
| D-Sorbitol               | -           | -  | - | -   | -  | -   |
| Methyl-D-mannopyranoside | -           | -  | - | -   | -  | -   |
| Methyl-D-glucopyranoside | -           | -  | - | -   | -  | -   |
| N-acetylglucosamine      | +           | +  | + | +   | +  | +   |
| Amygdaline               | -           | -  | - | -   | -  | -   |
| Arbutine                 | +           | -  | + | +   | +  | +   |
| Esculin                  | +           | +  | + | +   | +  | +   |
| Salicin                  | +           | -  | + | +   | +  | +   |
| D-Celiobiose             | +           | +  | + | +   | +  | +   |

|                            |   |   |   |   |   |   |
|----------------------------|---|---|---|---|---|---|
| <b>D-Maltose</b>           | + | + | + | + | + | + |
| <b>D-Lactose</b>           | + | + | + | + | + | + |
| <b>D-Melibiose</b>         | - | - | + | + | - | + |
| <b>D-Saccharose</b>        | - | + | + | + | - | + |
| <b>D-Trehalose</b>         | + | - | + | + | + | - |
| <b>Inulin</b>              | - | - | - | - | - | - |
| <b>D-Melezitose</b>        | - | - | - | - | - | - |
| <b>D-Raffinose</b>         | - | - | - | - | - | - |
| <b>Amidon</b>              | - | - | - | - | - | - |
| <b>Glycogen</b>            | - | - | - | - | - | - |
| <b>Xylitol</b>             | - | - | - | - | - | - |
| <b>Gentiobiose</b>         | + | - | + | + | - | + |
| <b>D-Turanose</b>          | - | - | - | - | - | - |
| <b>D-Lyxose</b>            | - | - | - | - | - | - |
| <b>D-Tagatose</b>          | + | + | + | + | + | - |
| <b>D-Fucose</b>            | - | - | - | - | - | - |
| <b>L-Fucose</b>            | - | - | - | - | - | - |
| <b>D-Arabitol</b>          | - | - | - | - | - | - |
| <b>L-Arabitol</b>          | - | - | - | - | - | - |
| <b>Potassium gluconate</b> | - | - | - | - | - | - |
| <b>2-Keto-gluconate</b>    | - | - | - | - | - | - |
| <b>5-Keto-gluconate</b>    | - | - | - | - | - | - |

(+) positive; (+/-) weakly positive; (-) negative.

## API 50 CH STRIPS

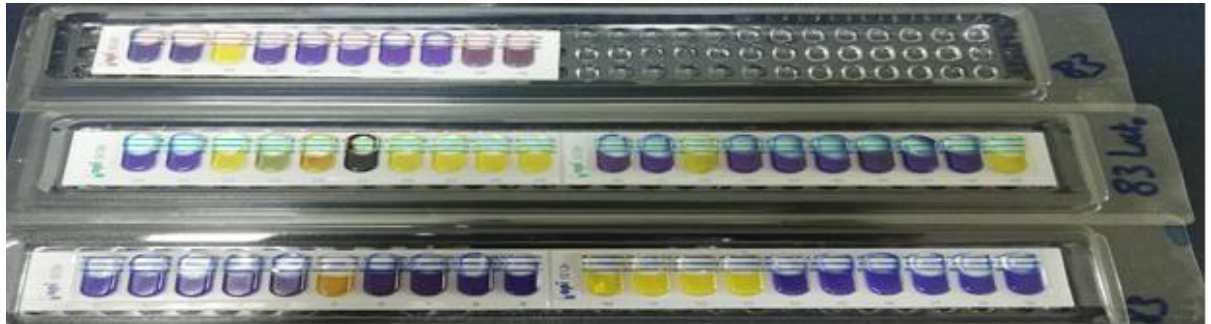

*Figure 1 Isolate no. 17 (code= 83)*

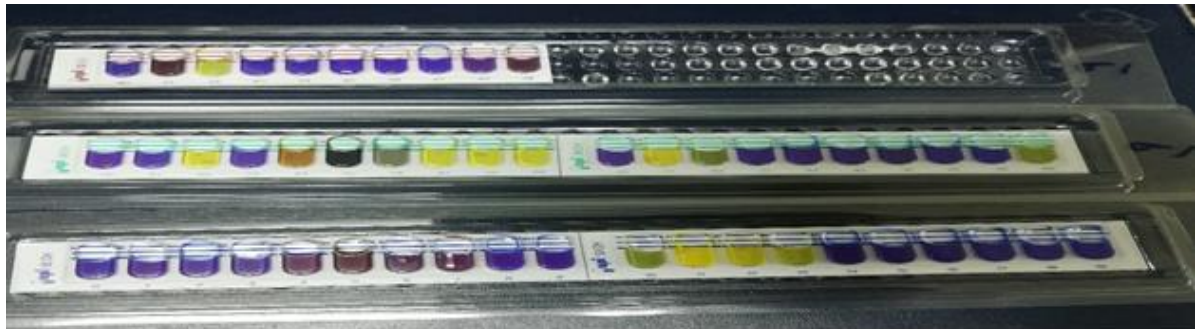

*Figure 2 Isolate no. 33 (code= 9)*

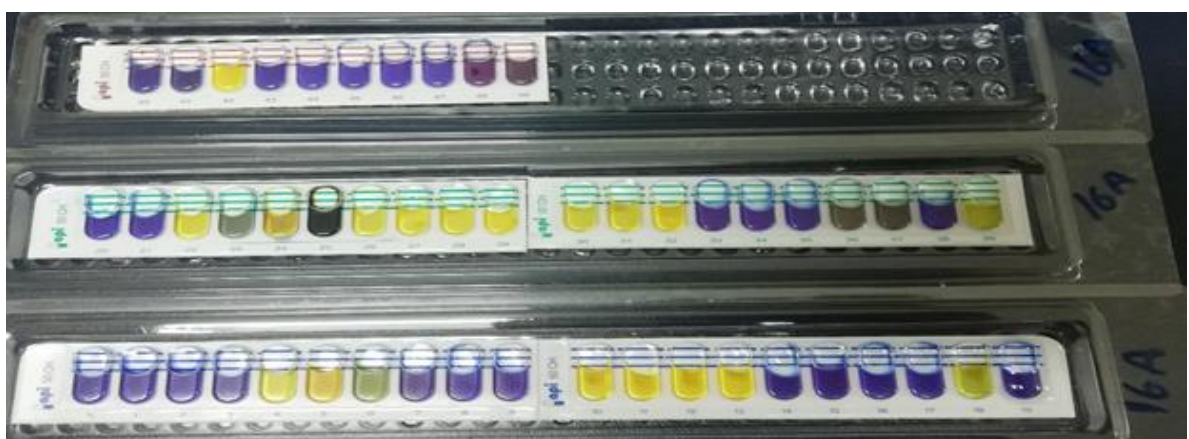

*Figure 3 Isolate no.1 (Code= 16A)*

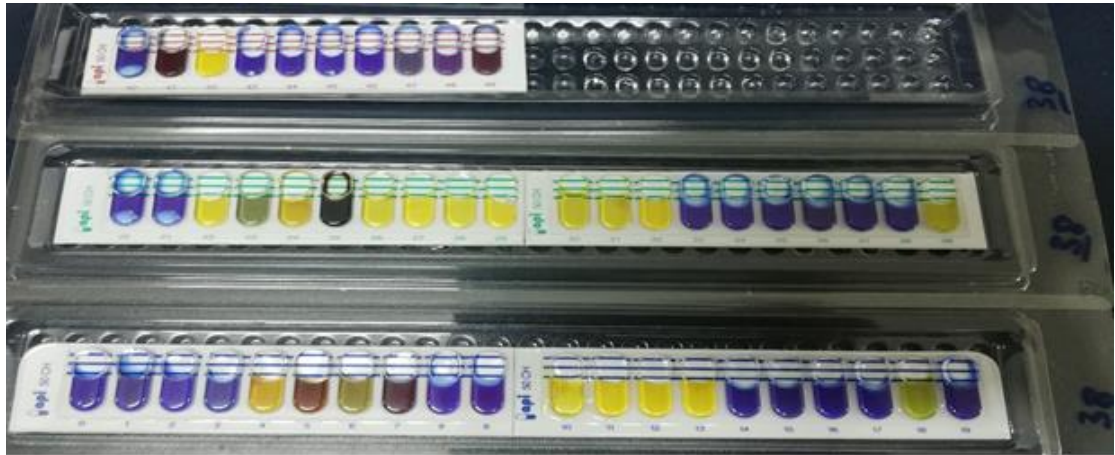

*Figure 4 Isolate no. 34 (Code= 38)*

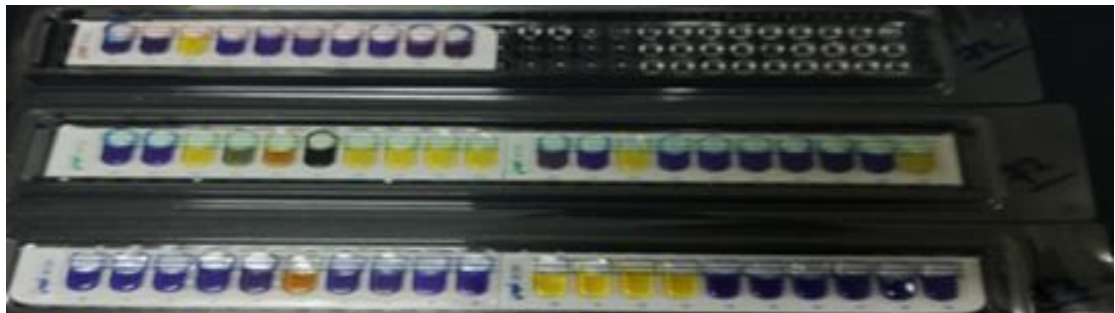

*Figure 5 Isolate no. 35 (Code= 72)*

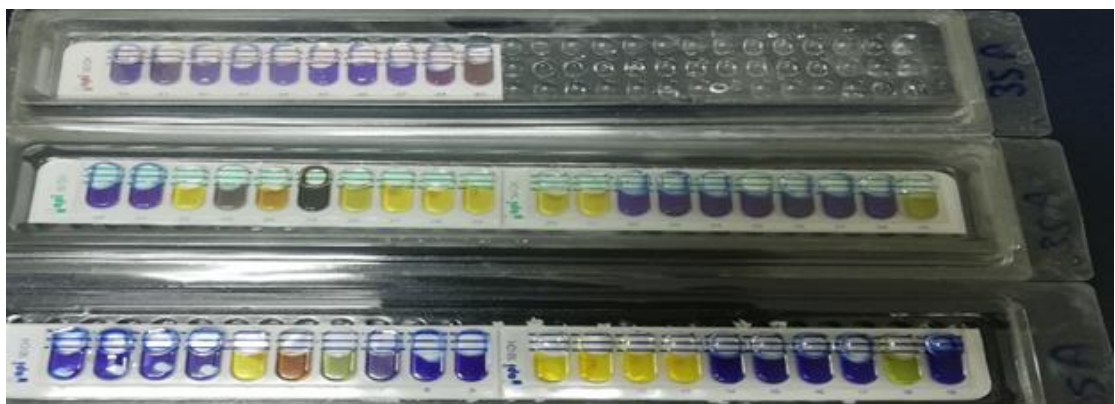

*Figure 6 Isolate no.16 (Code= 35A)*
